# Supplementary material for: Substantial somatic genomic variation and selection for BCOR mutations in human induced pluripotent stem cells
Source: PubMed Central journal article supplement (PMC9470532; doi:10.1038/s41588-022-01147-3), 2022-08-11
Supplement: 41588_2022_1147_MOESM1_ESM.pdf [file 41588_2022_1147_MOESM1_ESM.pdf]

**Supplementary information**

---

**Substantial somatic genomic variation and selection for *BCOR* mutations in human induced pluripotent stem cells**

---

In the format provided by the authors and unedited

## Supplementary Information

### Supplementary Note

The insignia cohort comprised of erythroblast-derived B-hiPSCs created from 78 individuals: 53 patients with inherited DNA repair defects including Oculomotor apraxia type 2 (*AOA2*), ataxia telangiectasia (*ATM*), selenoprotein deficiency (*SECISBP2*), Lynch Syndrome, Xeroderma Pigmentosum (*XPA*, *XPC*, *XPB*, *XPD*, *XPE*, *XPG* and *XPV*), homologous recombination deficiency (*BRCA1* and *BRCA2*), constitutional mismatch repair deficiency (*PMS2* and *MSH6*), five patients with exposure to environmental agents (chemotherapy at young age or fetal exposure to maternally-ingested valproate) and 20 healthy controls (Table S8).

### Supplementary Figures

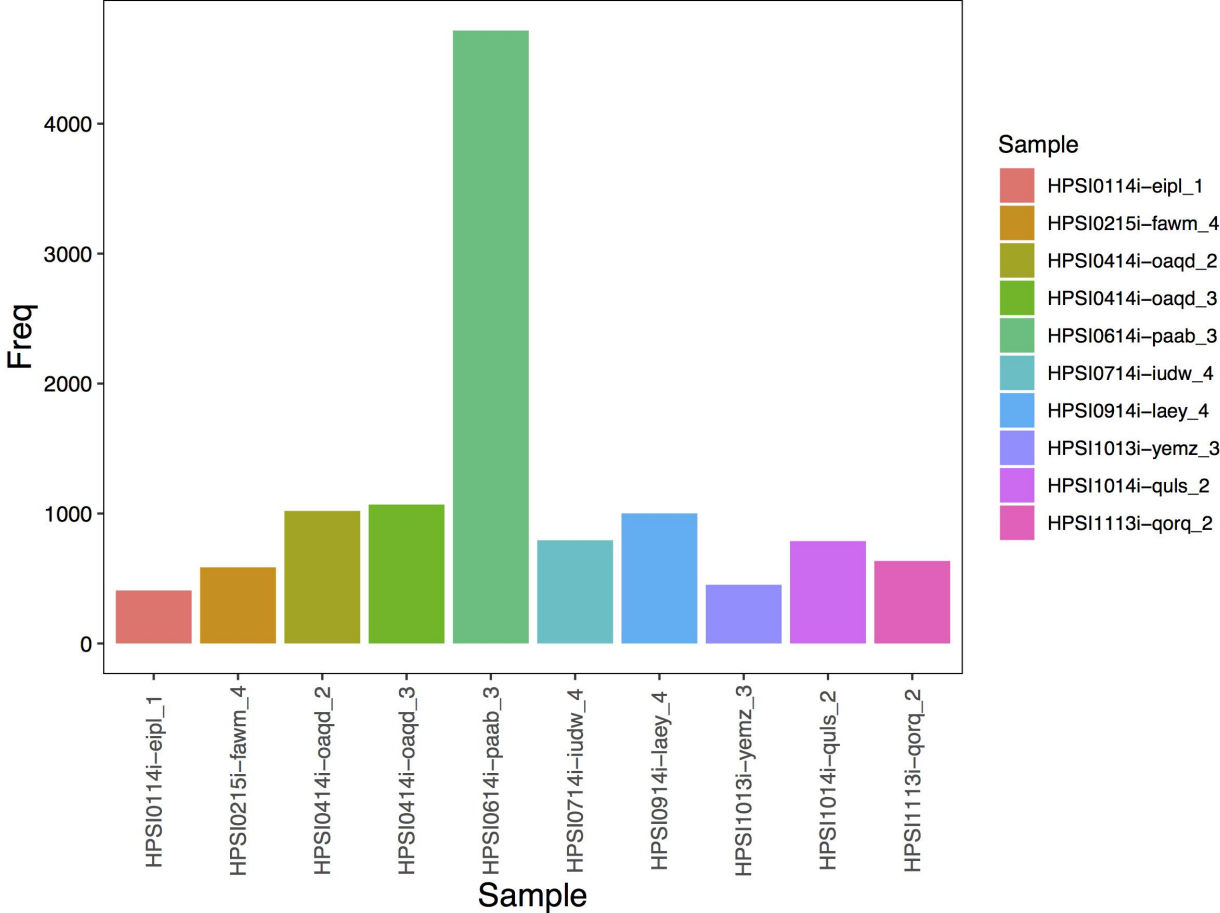

**Supplementary Fig. 1. Shared mutations in F-hiPSCs and fibroblasts.** Histogram showing number of substitutions that were removed from iPSCs by using fibroblast as “normal” for ten HipSci samples from Figure 1.

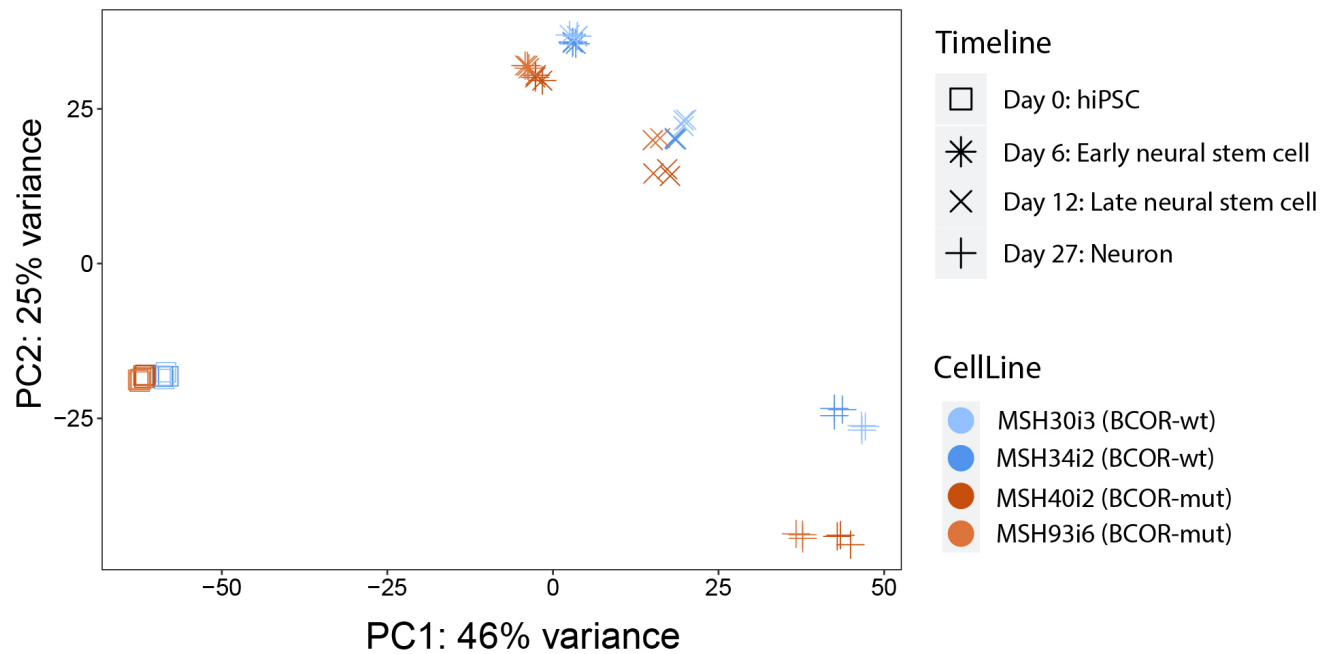

**Supplementary Fig. 2. Principal Component (PC) Analysis of RNA sequencing data.** PC analysis of RNA-seq data shows transcriptomic differences in both BCOR-mut lines compared to both BCOR-wt samples, across the neural differentiation stages.

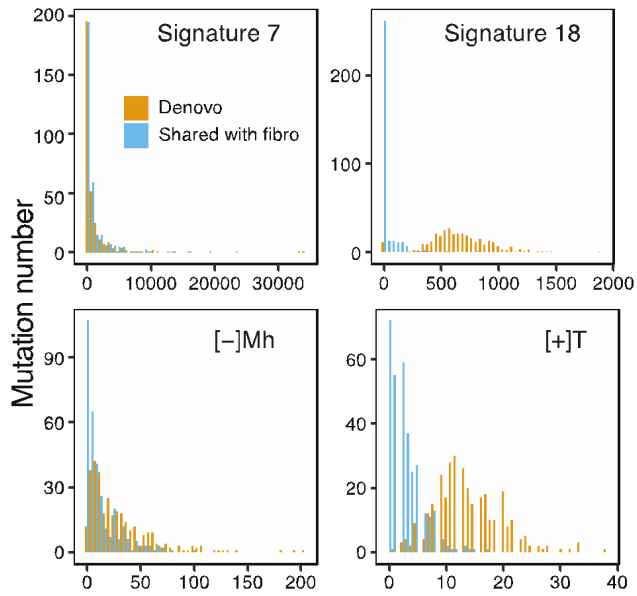

**Supplementary Fig. 3. Histogram of shared and private (de novo) mutations for signature 7 (UV), signature 18 (oxidative damage), [-]Mh and [+]T. Signature 18 was prevalent in de novo variants, in contrast to shared variants.**

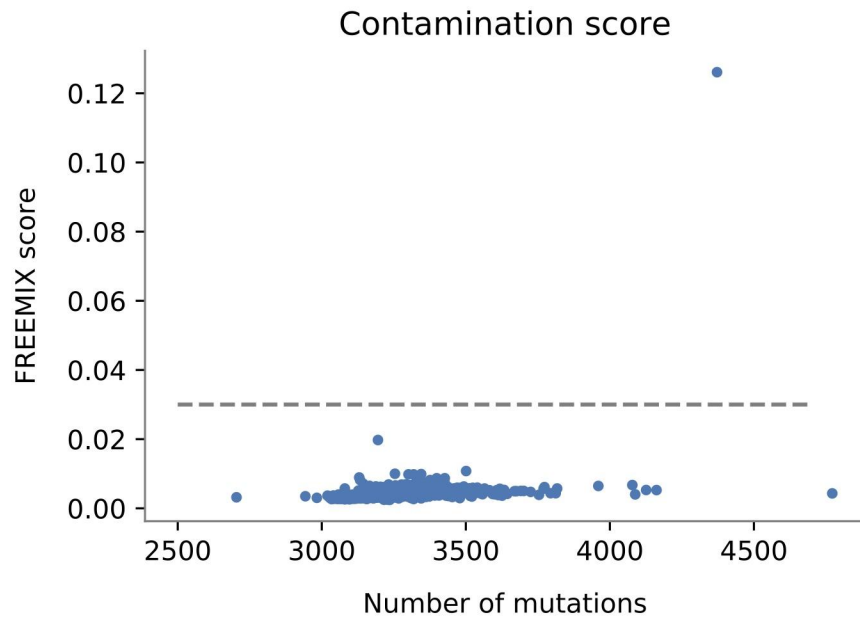

**Supplementary Fig. 4. Contamination score of cell lines.** There is no evidence of contamination except for one cell line and there is no correlation between the number of mutations and the FREEMIX score ( $R^2=0.1$ ). The dashed line at 0.03 is the threshold suggested by VerifyBamID to accept or potentially flag the sample as contaminated. The outlier cell line (HPSI0913pf-coyi) was removed from analysis.

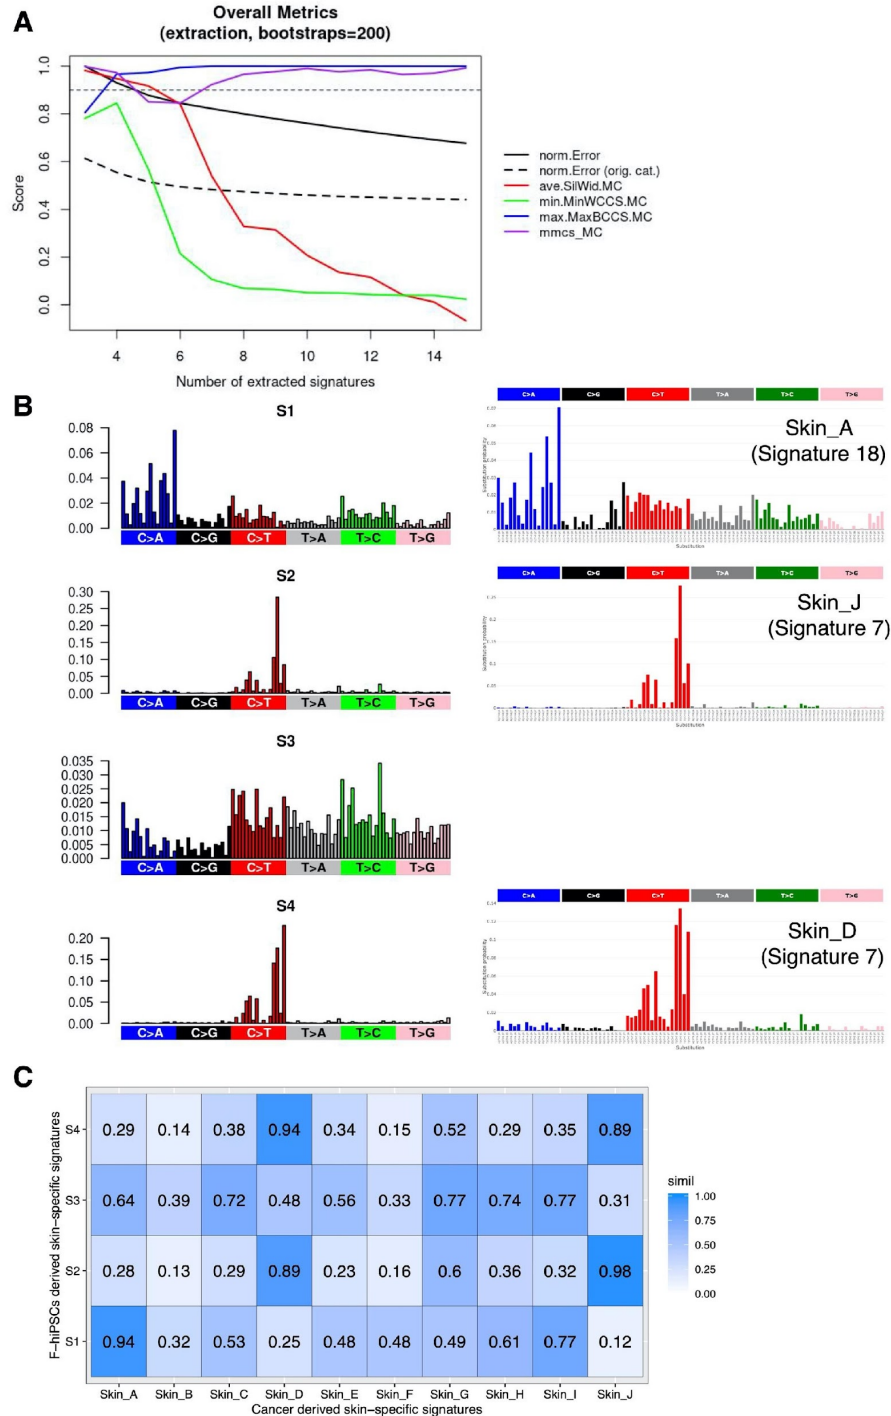

**Supplementary Fig 5. De novo extraction on 324 skin-derived WGS hiPSCs from the HipSci project.** (A) Metrics for selecting the optimal number of signatures. (B) Four mutational signatures extracted from this data set. Profiles of similar skin cancer derived signatures are shown. (C) Cosine similarities between F-iPSCs signatures and skin cancer derived signatures. S2 and S4 are most similar (cossim: 0.94-0.98) to UV-associated mutational signatures, Skin\_J and Skin\_D (signature 7), respectively. S1 is most similar to Skin\_A (signature 18), the culture signature (cossim: 0.94). S3 does not

show high similarity to any skin-specific signatures (cossim  $<0.8$ ), but also has very low probabilities for all 96 channels (note y-axis values are very small), and the relatively featureless profile would suggest that it is likely to be “noise”. This is not uncommon in signature extractions.
