# Supplementary material for: Substantial somatic genomic variation and selection for BCOR mutations in human induced pluripotent stem cells
Source: PubMed Central journal article supplement (PMC9470532; doi:10.1038/s41588-022-01147-3), 2022-08-11
Supplement: 41588_2022_1147_MOESM2_ESM.pdf [file 41588_2022_1147_MOESM2_ESM.pdf]

## Reporting Summary

Nature Portfolio wishes to improve the reproducibility of the work that we publish. This form provides structure for consistency and transparency in reporting. For further information on Nature Portfolio policies, see our [Editorial Policies](#) and the [Editorial Policy Checklist](#).

### Statistics

For all statistical analyses, confirm that the following items are present in the figure legend, table legend, main text, or Methods section.

n/a Confirmed

- The exact sample size ( $n$ ) for each experimental group/condition, given as a discrete number and unit of measurement
- A statement on whether measurements were taken from distinct samples or whether the same sample was measured repeatedly
- The statistical test(s) used AND whether they are one- or two-sided  
*Only common tests should be described solely by name; describe more complex techniques in the Methods section.*
- A description of all covariates tested
- A description of any assumptions or corrections, such as tests of normality and adjustment for multiple comparisons
- A full description of the statistical parameters including central tendency (e.g. means) or other basic estimates (e.g. regression coefficient) AND variation (e.g. standard deviation) or associated estimates of uncertainty (e.g. confidence intervals)
- For null hypothesis testing, the test statistic (e.g.  $F$ ,  $t$ ,  $r$ ) with confidence intervals, effect sizes, degrees of freedom and  $P$  value noted  
*Give  $P$  values as exact values whenever suitable.*
- For Bayesian analysis, information on the choice of priors and Markov chain Monte Carlo settings
- For hierarchical and complex designs, identification of the appropriate level for tests and full reporting of outcomes
- Estimates of effect sizes (e.g. Cohen's  $d$ , Pearson's  $r$ ), indicating how they were calculated

*Our web collection on [statistics for biologists](#) contains articles on many of the points above.*

### Software and code

Policy information about [availability of computer code](#)

**Data collection** CaVEMan (<http://cancerit.github.io/CaVEMan/>) (Jones et al., 2016), Pindel (<http://cancerit.github.io/cgpPindel/>) (Raine et al., 2015). The code of bespoke software is on github: <https://github.com/dg13/ips-seq>.

**Data analysis** All code used for analysis are detailed in the Methods section. The code of statistical analysis and figures is on github: [https://github.com/Nik-Zainal-Group/hipSCs\\_BCOR.git](https://github.com/Nik-Zainal-Group/hipSCs_BCOR.git). dN/dS ratios were calculated using dNdScv R package (<https://github.com/im3sanger/dndscv>)

For manuscripts utilizing custom algorithms or software that are central to the research but not yet described in published literature, software must be made available to editors and reviewers. We strongly encourage code deposition in a community repository (e.g. GitHub). See the Nature Portfolio [guidelines for submitting code & software](#) for further information.

### Data

Policy information about [availability of data](#)

All manuscripts must include a [data availability statement](#). This statement should provide the following information, where applicable:

- Accession codes, unique identifiers, or web links for publicly available datasets
- A description of any restrictions on data availability
- For clinical datasets or third party data, please ensure that the statement adheres to our [policy](#)

Links to raw sequencing data produced in this study are available from the HipSci project website ([www.hipsci.org](http://www.hipsci.org)). Raw data are deposited in the European Nucleotide Archive (ENA) under the following accessions: ERP006946 (WES, open access samples) and ERP017015 (WGS, open access samples), and in the European Genotype-Phenotype Archive under accession EGAS00001000592 (WES, managed access samples). The open access data samples are freely available to download, while the managed access data are available following a request and a data access agreement. The variant call sets are deposited at Mendeley: <https://data.mendeley.com/datasets/6rfc2xrnyd/1>

## Field-specific reporting

Please select the one below that is the best fit for your research. If you are not sure, read the appropriate sections before making your selection.

Life sciences       Behavioural & social sciences       Ecological, evolutionary & environmental sciences

For a reference copy of the document with all sections, see [nature.com/documents/nr-reporting-summary-flat.pdf](https://www.nature.com/documents/nr-reporting-summary-flat.pdf)

## Life sciences study design

All studies must disclose on these points even when the disclosure is negative.

|                 |                                                                                                                                                                                                                                                                                                                         |
|-----------------|-------------------------------------------------------------------------------------------------------------------------------------------------------------------------------------------------------------------------------------------------------------------------------------------------------------------------|
| Sample size     | The sample size was 555 human iPSC cells lines from multiple cohorts including HipSci, one of the largest iPSC cell repositories in the world. This was a systematic study on the mutational landscape of hiPSC WGS. We included as many iPSCs as possible and therefore maximized the sample size as much as possible. |
| Data exclusions | No data or cell lines were excluded.                                                                                                                                                                                                                                                                                    |
| Replication     | The data analysis was replicated independently by co-authors. Some patients had multiple iPSC cells lines generated and sequenced. Some hiPSCs were single-cell sub-cloned (outlined in Table S14). The differentiation and immunostaining experiments were performed in triplicates.                                   |
| Randomization   | There was no randomization as it was an observational and descriptive study on human iPSC cells.                                                                                                                                                                                                                        |
| Blinding        | This was not a clinical trial. The investigators were not blinded to allocation during experiments and outcome assessment.                                                                                                                                                                                              |

## Reporting for specific materials, systems and methods

We require information from authors about some types of materials, experimental systems and methods used in many studies. Here, indicate whether each material, system or method listed is relevant to your study. If you are not sure if a list item applies to your research, read the appropriate section before selecting a response.

### Materials & experimental systems

| n/a                                 | Involved in the study                                           |
|-------------------------------------|-----------------------------------------------------------------|
| <input checked="" type="checkbox"/> | <input type="checkbox"/> Antibodies                             |
| <input type="checkbox"/>            | <input checked="" type="checkbox"/> Eukaryotic cell lines       |
| <input checked="" type="checkbox"/> | <input type="checkbox"/> Palaeontology and archaeology          |
| <input checked="" type="checkbox"/> | <input type="checkbox"/> Animals and other organisms            |
| <input type="checkbox"/>            | <input checked="" type="checkbox"/> Human research participants |
| <input checked="" type="checkbox"/> | <input type="checkbox"/> Clinical data                          |
| <input checked="" type="checkbox"/> | <input type="checkbox"/> Dual use research of concern           |

### Methods

| n/a                                 | Involved in the study                           |
|-------------------------------------|-------------------------------------------------|
| <input checked="" type="checkbox"/> | <input type="checkbox"/> ChIP-seq               |
| <input checked="" type="checkbox"/> | <input type="checkbox"/> Flow cytometry         |
| <input checked="" type="checkbox"/> | <input type="checkbox"/> MRI-based neuroimaging |

## Eukaryotic cell lines

Policy information about [cell lines](#)

|                                                                      |                                                                                                                                                                                                                                  |
|----------------------------------------------------------------------|----------------------------------------------------------------------------------------------------------------------------------------------------------------------------------------------------------------------------------|
| Cell line source(s)                                                  | The cell lines were from HipSci and the Insignia projects. Some hiPSCs from S2 and S7 have been previously published ( <a href="https://doi.org/10.1371/journal.pgen.1004432">https://doi.org/10.1371/journal.pgen.1004432</a> ) |
| Authentication                                                       | The cell lines have been authenticated by HipSci and Insignia .                                                                                                                                                                  |
| Mycoplasma contamination                                             | All cell lines tested negative for mycoplasma.                                                                                                                                                                                   |
| Commonly misidentified lines<br>(See <a href="#">ICLAC</a> register) | There were no commonly misidentified lines.                                                                                                                                                                                      |

## Human research participants

Policy information about [studies involving human research participants](#)

|                            |                                                                                                                                                                                                                                                                                                                                                                                                                                                                                                                                            |
|----------------------------|--------------------------------------------------------------------------------------------------------------------------------------------------------------------------------------------------------------------------------------------------------------------------------------------------------------------------------------------------------------------------------------------------------------------------------------------------------------------------------------------------------------------------------------------|
| Population characteristics | All participants were organ donors, volunteers via the NIHR Cambridge Bioresource or recruited for the Insignia project (doi: <a href="https://doi.org/10.1101/2020.08.04.234245">https://doi.org/10.1101/2020.08.04.234245</a> ) and appropriately consented. The exact age information of the human patient samples is not publicly available as the information could compromise privacy and lead to identification of individuals. The gender and genotype of the Insignia participants are as follows:<br><br>Samples Genotype Gender |
|----------------------------|--------------------------------------------------------------------------------------------------------------------------------------------------------------------------------------------------------------------------------------------------------------------------------------------------------------------------------------------------------------------------------------------------------------------------------------------------------------------------------------------------------------------------------------------|

MSH65 AOA2 Male  
MSH69 AOA2 Male  
MSH70 AOA2 Male  
MSH80 AT Female  
MSH11 ATM Female  
MSH5 Chemo Female  
MSH88 Chemo Female  
MSH77 CMMRD Male  
MSH94 CMMRD Female  
MSH25 Control Female  
MSH39 Control Female  
MSH53 Control Female  
MSH59 Control Male  
MSH63 Control Male  
MSH98 Control Male  
MSH20 XPC Male  
MSH40 XPC Male  
MSH93 XPD Male  
MSH95 XPD Female  
MSH97 XPD Male  
MSH43 XPG Male  
MSH71 AOA2 Female  
MSH68 AOA2 Male  
MSH13 ATM Female  
MSH29 Control Female  
MSH90 Myelofibrosis Male  
MSH3 PMS2 Female  
MSH41 XPC Male  
MSH67 AOA2 Male  
MSH72 AOA2 Male  
MSH14 ATM Female  
MSH28 ATM Female  
MSH35 ATM Female  
MSH44 ATM Male  
MSH48 ATM Male  
MSH46 BLM Male  
MSH73 BRCA1 Male  
MSH75 BRCA1 Male  
MSH74 BRCA2 Male  
MSH76 BRCA2 Male  
MSH89 CMMRD Female  
MSH54 Cockaynes Female  
MSH55 Cockaynes Female  
MSH22 Control Male  
MSH23 Control Female  
MSH26 Control Female  
MSH31 Control Male  
MSH33 Control Female  
MSH36 Control Female  
MSH45 Control Female  
MSH52 Control Female  
MSH58 Control Female  
MSH61 Control Male  
MSH62 Control Female  
MSH64 Control Female  
MSH87 Control Female  
MSH51 FVS Female  
MSH56 FVS Male  
MSH79 FVS Female  
MSH47 Lynch Female  
MSH60 Lynch Male  
MSH78 Lynch Female  
MSH57 RTS Female  
MSH6 SECISBP2 Male  
MSH8 SECISBP2 Male  
MSH2 XPA Male  
MSH86 XPB Female  
MSH21 XPC Male  
MSH42 XPC Female  
MSH30 XPD Male  
MSH37 XPD Male  
MSH91 XPE Female  
MSH27 XPG Female  
MSH32 XPG Female  
MSH34 XPG Male  
MSH92 XPV Male

MSH19 XPV Male  
MSH85 XPV Female

Recruitment

Recruitment was voluntary for all research participants. We aimed to recruit as many patients with DNA repair deficiency as possible.

Ethics oversight

HipSci: REC 09/H0304/77, V2 04/01/2013, REC 09/H0304/77, V3 15/03/2013; Insignia: REC 13/EE/0302; organ donors: REC 09/H306/73)

Note that full information on the approval of the study protocol must also be provided in the manuscript.
